# Supplementary material for: Neutron Flux Profiling as a Benchmark for the Applicability of Neutron Activation Analysis in Nuclear Safeguards at a Training Reactor
Source: Research Square preprint supplement (doi:10.21203/rs.3.rs-7601294/v1), 2025-09-29
Supplement: Supplementary file 1 [file 56fd1d3a3371dfbadf95e6d0.xlsx]

## Sheet: measurement_4
2024-01-29
M4		Experiment 1						Experiment 2													Experiment 3
		5mm Dy foil in Cd and Al packaging						5mm dia Au foil in Cd and Al packaging (Gold 1 & 2)
		m = 5.82 mg						m = 16.10 mg																	8.2494e-05
		N = 1kW						N = 10 kW
		t_irr = 40 s						t_irr = 10 s													[mm]	CPS	time	time	counts	counts for matlab
																					0	59	11:07:02.217000	0	59	59
																					5	59	11:07:13.215000	10.998	59.0536	59.0535531302886
																					10	85	11:07:24.260000	22.043	85.1547	85.1547058222508
									time of measurement = 100s	100											15	123	11:07:35.243000	33.026	123.336	123.335563670855
									End of irradiation: 11:08	11:08:00											20	127	11:07:46.350000	44.133	127.463	127.463212306135
																					25	220	11:07:57.457000	55.24	221.005	221.004820224283
									Shield	Time	Coincidents	Beta	Gamma	Units							30	618	11:08:08.596000	66.379	621.393	621.393367537985
								Background	No	-	3	63	1775	counts/100s		time between irradiation and start of measurement [s]					35	1282	11:08:19.484000	77.267	1290.2	1290.19764352384
								Gold 1	No	11:47:00	7182	332102	70794	counts/100s	00:39:00	2340					40	5706	11:08:31.496000	89.279	5748.18	5748.17969734131
								Gold 1	Beta	11:44:00	11	2540	71200	counts/100s	00:36:00	2160					45	6300	11:08:42.510000	100.293	6352.34	6352.33968456902
								Gold 2	No	12:00:00	1087	51082	11544	counts/100s	00:52:00	3120					50	7127	11:08:53.555000	111.338	7192.76	7192.76097511077
								Gold 2	Beta	11:57:00	4	387	11331	counts/100s	00:49:00	2940					55	7853	11:09:04.537000	122.32	7932.64	7932.64310439242
																					60	8574	11:09:15.644000	133.427	8668.89	8668.89462717171
																					65	9570	11:09:26.752000	144.535	9684.79	9684.7885974353
																					70	10489	11:09:37.906000	155.689	10624.6	10624.583242867
								lambda Au	2.9759e-06												75	11462	11:09:49.122000	166.905	11620.9	11620.9077634793
									Shield	Time	Coincidents [counts/s]	Beta [counts/s]	Gamma [counts/s]	time between irradiation and start of measurement [s]		Activity [1/s] (E.27)	tał = 0,5 mikro sec				80	12497	11:10:00.307000	178.09	12682	12681.9530526029
								Background	No	-	0.03	0.63	17.75	-							85	13482	11:10:11.196000	188.979	13693.8	13693.8261728715
								Gold 1	No	11:47:00	72.3219	3344.23	712.887	2340	A_1	33037.7					90	14705	11:10:22.444000	200.227	14949.9	14949.9071406846
								Gold 1	Beta	11:44:00	0.110709	25.5638	716.591	2160							95	15842	11:10:33.645000	211.428	16120.7	16120.732432122
								Gold 2	No	12:00:00	10.9714	515.585	116.517	3120	A_2	4648.81					100	16779	11:10:44.549000	222.332	17089.6	17089.583909204
								Gold 2	Beta	11:57:00	0.0403515	3.90401	113.31	2940							105	18346	11:10:57.825000	235.608	18706.1	18706.064986058
															A_th=A_1-A_2	28388.9					110	19524	11:11:08.698000	246.481	19925	19925.0487182972
																					115	20437	11:11:19.743000	257.526	20875.8	20875.8151892458
																					120	21513	11:11:30.725000	268.508	21994.8	21994.8358030189
								N_T (E.19)	4.92161e+19												125	22265	11:11:41.801000	279.584	22784.5	22784.4874133615
								sigma_v_act (E.18) [cm^2]	8.09056e-23												130	23055	11:11:52.955000	290.738	23614.6	23614.6384303736
								PHI (E.23)	2.54736e+11												135	23950	11:12:04.780000	302.563	24555.3	24555.3055128185
																					140	23818	11:12:14.982000	312.765	24440.5	24440.5299596626
																					145	24277	11:12:26.136000	323.919	24934.5	24934.4594012532
																					150	24477	11:12:37.384000	335.167	25163.2	25163.2136309501
																					155	24521	11:12:48.663000	346.446	25231.9	25231.9132695257
																					160	24530	11:12:59.879000	357.662	25264.5	25264.5394564288
																					165	24149	11:13:10.799000	368.582	24894.5	24894.5463430467
																					170	23368	11:13:24.440000	382.223	24116.6	24116.5578142365
																					175	21815	11:13:34.933000	392.716	22533.3	22533.3064503567
																					180	20575	11:13:45.790000	403.573	21271.5	21271.5197736427
																					185	19476	11:13:56.804000	414.587	20153.6	20153.6186587891
																					190	19124	11:14:07.895000	425.678	19807.5	19807.4860816444
																					195	18709	11:14:19.340000	437.123	19396	19395.9580261421
																					200	19011	11:14:30.188000	447.971	19726.7	19726.6922873814
																					205	19000	11:14:41.770000	459.553	19734.1	19734.1240435892
																					210	19450	11:14:52.231000	470.014	20219	20218.9519989001
																					215	19958	11:15:03.494000	481.277	20766.3	20766.3213193468
																					220	20705	11:15:14.773000	492.556	21563.6	21563.6301876507
																					225	20977	11:15:25.958000	503.741	21867.1	21867.0772807275
																					230	21896	11:15:36.862000	514.645	22845.6	22845.612175262
																					235	22230	11:15:47.829000	525.612	23215.1	23215.0909448233
																					240	23215	11:15:58.827000	536.61	24265.7	24265.7453858359
																					245	24291	11:16:09.903000	547.686	25413.7	25413.6566737257
																					250	25313	11:16:20.886000	558.669	26506.9	26506.8956225164
																					255	26322	11:16:31.993000	569.776	27588.8	27588.7523273173
																					260	26600	11:16:43.100000	580.883	27905.7	27905.6883061763
																					265	27291	11:16:54.223000	592.006	28656.9	28656.889685635
																					270	27770	11:17:05.112000	602.895	29186.1	29186.0685912792
																					275	28867	11:17:16.328000	614.111	30367.1	30367.0918579563
																					280	29784	11:17:27.607000	625.39	31360.9	31360.9105069483
																					285	30156	11:17:38.480000	636.263	31781.1	31781.0994955238
																					290	30874	11:17:49.650000	647.433	32567.8	32567.7883494395
																					295	31832	11:18:02.411000	660.194	33613.7	33613.7122076235
																					300	32332	11:18:13.424000	671.207	34172.7	34172.7304166906
																					305	33125	11:18:24.297000	682.08	35042.3	35042.2949456074
																					310	33339	11:18:35.233000	693.016	35300.5	35300.5135279908
																					315	33756	11:18:46.153000	703.936	35774.3	35774.26004842
																					320	34052	11:18:57.276000	715.059	36121.1	36121.0865835798
																					325	34246	11:19:08.383000	726.166	36360.2	36360.1746468245
																					330	34338	11:19:19.319000	737.102	36490.8	36490.759695497
																					335	34287	11:19:30.535000	748.318	36470.3	36470.2909508738
																					340	34880	11:19:41.798000	759.581	37135.5	37135.5390673706
																					345	36421	11:19:53.620000	771.403	38814	38814.023558936
																					350	36851	11:20:04.262000	782.045	39306.8	39306.768788176
																					355	37258	11:20:16.914000	794.697	39782.4	39782.3912258316
																					360	37197	11:20:27.928000	805.711	39753.4	39753.3612494631
																					365	37935	11:20:38.926000	816.709	40578.9	40578.8794908334
																					370	38385	11:20:49.955000	827.738	41097.6	41097.6169040184
																					375	38416	11:21:01.310000	839.093	41169.4	41169.3536850807
																					380	38794	11:21:12.185000	849.968	41611.8	41611.759795694
																					385	38779	11:21:23.292000	861.075	41633.8	41633.8002151639
																					390	38781	11:21:34.181000	871.964	41673.4	41673.3648515996
																					395	39511	11:21:45.366000	883.149	42497	42497.0033989543
																					400	38967	11:21:56.224000	894.007	41949.4	41949.4492648097
																					405	39361	11:22:07.503000	905.286	42413.1	42413.0500046022
																					410	39480	11:22:18.641000	916.424	42580.4	42580.3828972395
																					415	39276	11:22:31.355000	929.138	42404.8	42404.8147277024
																					420	39171	11:22:42.322000	940.105	42329.7	42329.7290513269
																					425	39403	11:22:53.257000	951.04	42618.9	42618.8653335353
																					430	39455	11:23:04.271000	962.054	42713.9	42713.901028493
																					435	39553	11:23:15.316000	973.099	42859	42859.0286593627
																					440	39373	11:23:26.236000	984.019	42702.4	42702.4338806092
																					445	38983	11:23:37.328000	995.111	42318.2	42318.1593306652
																					450	39235	11:23:48.263000	1006.05	42630.2	42630.1570931007
																					455	38391	11:23:59.417000	1017.2	41751.5	41751.5219652186
																					460	38700	11:24:10.665000	1028.45	42126.6	42126.6408469841
																					465	38496	11:24:21.944000	1039.73	41943.6	41943.5861632309
																					470	38080	11:24:33.980000	1051.76	41531.5	41531.5465437822
																					475	37670	11:24:45.812000	1063.6	41124.5	41124.5051572651
																					480	37242	11:24:56.794000	1074.58	40694.1	40694.105742014
																					485	36687	11:25:07.870000	1085.65	40124.3	40124.3055896362
																					490	37087	11:25:18.853000	1096.64	40598.5	40598.5495749712
																					495	37019	11:25:29.944000	1107.73	40561.2	40561.2051695418
																					500	36142	11:25:41.670000	1119.45	39638.6	39638.6132716824
																					505	35516	11:25:52.174000	1129.96	38985.8	38985.8171613219
																					510	35082	11:26:03.157000	1140.94	38544.3	38544.323073683
																					515	34919	11:26:14.311000	1152.09	38400.6	38400.5537697154
																					520	34428	11:26:25.184000	1162.97	37894.6	37894.5738033981
																					525	33991	11:26:36.478000	1174.26	37448.4	37448.4460092224
																					530	33096	11:26:47.664000	1185.45	36496.1	36496.0719442807
																					535	32859	11:27:00.783000	1198.57	36274	36273.9599042398
																					540	31852	11:27:11.734000	1209.52	35194.1	35194.0843938534
																					545	31059	11:27:22.686000	1220.47	34348.9	34348.8978511019
																					550	30239	11:27:33.684000	1231.47	33472.4	33472.3947333996
																					555	29641	11:27:44.744000	1242.53	32840.4	32840.4011728628
																					560	29249	11:27:55.711000	1253.49	32435.4	32435.4207497178
																					565	28435	11:28:06.849000	1264.63	31561.7	31561.7287787642
																					570	27536	11:28:17.925000	1275.71	30591.8	30591.8132931986
																					575	27042	11:28:29.110000	1286.89	30070.7	30070.7248473819
																					580	26353	11:28:39.999000	1297.78	29330.9	29330.891741108
																					585	25624	11:28:51.910000	1309.69	28547.6	28547.5512976504
																					590	25255	11:29:01.995000	1319.78	28159.9	28159.8684182555
																					595	24333	11:29:12.869000	1330.65	27156.2	27156.1678045156
																					600	23843	11:29:23.851000	1341.63	26633.4	26633.4345301863
																					605	23444	11:29:34.802000	1352.59	26211.4	26211.4065467289
																					610	23172	11:29:45.831000	1363.61	25930.9	25930.8806305915
																					615	22336	11:29:56.876000	1374.66	25018.1	25018.130445883
																					620	21863	11:30:07.843000	1385.63	24510.5	24510.4969993147
																					625	21300	11:30:18.966000	1396.75	23901.2	23901.2418392941
																					630	20471	11:30:30.730000	1408.51	22993.3	22993.3042500532
																					635	19979	11:30:41.227000	1419.01	22460.1	22460.1238704699
																					640	19682	11:30:52.116000	1429.9	22146.1	22146.1248678755
																					645	19432	11:31:03.286000	1441.07	21885	21884.9824411436
																					650	19325	11:31:15.766000	1453.55	21786.9	21786.8939839872
																					655	19087	11:31:26.732000	1464.52	21538	21538.0492780034
																					660	19266	11:31:37.684000	1475.47	21759.7	21759.6859166944
																					665	20070	11:31:48.697000	1486.48	22688.4	22688.3544329426
																					670	20648	11:31:59.742000	1497.52	23363	23363.0383902505
																					675	22071	11:32:10.740000	1508.52	24995.8	24995.8185595594
																					680	23562	11:32:21.816000	1519.6	26708.8	26708.7965908421
																					685	24834	11:32:32.674000	1530.46	28175.9	28175.9035318157
																					690	25314	11:32:43.843000	1541.63	28747	28746.9715211397
																					695	24855	11:32:54.763000	1552.55	28251.2	28251.1621395561
																					700	25004	11:33:05.917000	1563.7	28446.7	28446.6841727286
																					705	24848	11:33:16.806000	1574.59	28294.6	28294.610235504
																					710	24472	11:33:27.695000	1585.48	27891.5	27891.4991532478
																					715	23861	11:33:38.677000	1596.46	27219.8	27219.7720062012
																					720	23201	11:33:49.629000	1607.41	26490.8	26490.790631011
																					725	22288	11:34:00.627000	1618.41	25471.4	25471.4305517752
																					730	21310	11:34:11.500000	1629.28	24375.6	24375.5953054283
																					735	19788	11:34:22.482000	1640.26	22655.2	22655.1598788684
																					740	18598	11:34:33.605000	1651.39	21312.3	21312.2829349691
																					745	17013	11:34:44.712000	1662.5	19513.8	19513.8318564545
																					750	15655	11:34:55.835000	1673.62	17972.7	17972.6960004776
																					755	7957	11:35:06.724000	1684.51	9143.23	9143.22971590557
																					760	6625	11:35:17.878000	1695.66	7619.66	7619.66304318586
																					765	1692	11:35:30.233000	1708.02	1948.02	1948.01762077661
																					770	1464	11:35:41.169000	1718.95	1687.04	1687.04007583703
																					775	332	11:35:52.120000	1729.9	382.926	382.925902194347
																					780	262	11:36:03.134000	1740.92	302.463	302.463202921698
																					785	192	11:36:14.178000	1751.96	221.854	221.854454899902
																					790	184	11:36:25.161000	1762.94	212.803	212.803238307423
																					795	118	11:36:36.268000	1774.05	136.597	136.596742812428
